# Supplementary material for: Steroid-refractory PD-(L)1 pneumonitis: incidence, clinical features, treatment, and outcomes
Source: PubMed Central journal article supplement — J Immunother Cancer. 2021 Jan 7;9(1):e001731. doi: 10.1136/jitc-2020-001731 (PMC7797270; doi:10.1136/jitc-2020-001731), 2021-01-07
Supplement: jitc-2020-001731supp001.pdf [file jitc-2020-001731supp001.pdf]

**Supplemental figure 1.** Infiltrate type and laterality of ICI-pneumonitis upon diagnostic computed tomography scan. Infiltrate types were classified as having consolidation, ground-glass opacities (GGOs), crazy-paving pattern, traction bronchiectasis, or nodularity and were either unilateral or bilateral. The infiltrate types reported are depicted in the Venn diagram with further treatment group-specific details depicted in the associated table. One case only depicted features of nodularity as is shown as an adjunct to the Venn diagram.

**Abbreviations:** ICI – immune-checkpoint inhibitor; GGOs – ground glass opacities; IVIG – intravenous immunoglobulin

**Supplemental table 1.** Baseline characteristics, steroid-refractory ICI-pneumonitis cases, treatments, and outcomes by individual patients in the case series.

| Therapy type                                    | IVIg only    |                 |                |            |            |            |            | Infliximab only   |            | Combination       |
|-------------------------------------------------|--------------|-----------------|----------------|------------|------------|------------|------------|-------------------|------------|-------------------|
| Patient number                                  | 1            | 2               | 3              | 4          | 5          | 6          | 7          | 8                 | 9          | 10                |
| <b>Patient characteristics</b>                  |              |                 |                |            |            |            |            |                   |            |                   |
| Age at ICI-P diagnosis, years                   | 61           | 85              | 35             | 76         | 64         | 73         | 71         | 68                | 64         | 79                |
| Sex                                             | F            | M               | M              | F          | F          | M          | M          | F                 | F          | M                 |
| Race                                            | W            | W               | B              | W          | W          | W          | W          | W                 | W          | W                 |
| Smoking status, pack years                      | Former, 17/5 | Never           | Never          | Former, 50 | Never      | Former, 25 | Former, 25 | Former, 60        | Former, 15 | Former 37.5       |
| Primary tumor site                              | NSCLC        | Pancreatic      | SCLC           | NSCLC      | NSCLC      | NSCLC      | RCC        | NSCLC             | NSCLC      | Oropharyngeal     |
| Tumor histology                                 | Adeno        | Adeno           | N/A            | Adeno      | Adeno      | Adeno      | Papillary  | Adeno             | Adeno      | SCC               |
| Initial cancer stage (I-IV)                     | IIIA         | III             | III            | II         | IV         | IV         | IV         | II                | IV         | IV                |
| Prior systemic therapy                          | cis, pem     | gem, abr        | cis, etop, cap | carbo      | carbo, pem | carbo, pem | N/A        | carbo, paclitaxel | carbo, pem | carbo, paclitaxel |
| Initial surgery                                 | N            | N               | N              | Y          | N          | N          | N          | N                 | N          | Y                 |
| Prior chest radiation                           | Y            | N               | Y              | Y          | N          | Y          | N          | Y                 | N          | Y                 |
| Last radiation dose to ICI-P onset, days        | 68           | N/A             | 612            | 196        | N/A        | 228        | N/A        | 739               | N/A        | 516               |
| PD-1/PD-L1 agent                                | durva        | pembro          | nivo           | durva      | pembro     | pembro     | pembro     | nivo              | nivo       | pembro            |
| Agents given with ICI                           | N/A          | GVAX, cyclophos | ipi            | N/A        | carbo, pem | carbo, pem | carbo, pem | ipi               | N/A        | N/A               |
| Enrolled in clinical trial                      | N            | Y               | Y              | N          | N          | N          | N          | Y                 | N          | N                 |
| 3-month response to ICI <sup>a</sup>            | PR           | SD              | PD             | SD         | SD         | SD         | PD         | PR                | PD         | PR                |
| <b>ICI-pneumonitis characteristics</b>          |              |                 |                |            |            |            |            |                   |            |                   |
| Initial ICI-P grade <sup>b</sup>                | 3            | 3               | 3              | 3          | 2          | 2          | 2          | 3                 | 3          | 3                 |
| Time to ICI-P, days                             | 92           | 206             | 39             | 167        | 113        | 208        | 63         | 182               | 14         | 77                |
| Number of doses of ICI                          | 6            | 5               | 3              | 4          | 6          | 10         | 3          | 13                | 1          | 3                 |
| Initial steroid dose, pred equivalents (mg/day) | 100          | 75              | 60             | 60         | 50         | 75         | 237.5      | 75                | 60         | 187.5             |
| Steroid type, route                             | pred, PO     | MP, IV          | pred, PO       | pred, PO   | pred, PO   | pred, PO   | MP, IV     | MP, IV            | pred, PO   | MP, IV            |
| Total steroid duration                          | 32           | 43              | 122            | 8          | 103        | 88         | 14         | 97                | 19         | 41                |
| Time from steroid to IVIG, days                 | 3            | 2               | 7              | 7          | 96         | 2          | 5          | N/A               | N/A        | 3                 |
| Total days of administration of IVIG            | 5            | 5               | 14             | 2          | 5          | 4          | 4          | N/A               | N/A        | 5                 |

|                                       |     |     |                |       |     |       |       |                  |       |       |
|---------------------------------------|-----|-----|----------------|-------|-----|-------|-------|------------------|-------|-------|
| Time from steroid to infliximab, days | N/A | N/A | N/A            | N/A   | N/A | N/A   | N/A   | 4                | 12    | 8     |
| Infliximab dose (mg/kg)               | N/A | N/A | N/A            | N/A   | N/A | N/A   | N/A   | 5                | 5     | 5     |
| Number of hospitalizations            | 1   | 1   | 3              | 1     | 1   | 1     | 1     | 1                | 1     | 2     |
| Total days hospitalized <sup>c</sup>  | 43  | 12  | 35             | 9     | 6   | 48    | 13    | 13               | 14    | 27    |
| Intubation for ICI-P                  | N   | N   | N              | Y     | N   | N     | N     | Y                | N     | N     |
| Extubation post-immunosuppression     | N/A | N/A | N/A            | N     | N/A | N/A   | N/A   | Y                | N/A   | N/A   |
| Infection post-immunosuppression      | N   | N   | Y <sup>d</sup> | N     | N   | N     | N     | Y <sup>e</sup>   | N     | N     |
| Cause of death                        | ICH | CP  | CP             | ICI-P | PE  | ICI-P | ICI-P | PNA <sup>e</sup> | ICI-P | ICI-P |

**Abbreviations:** IVIG – intravenous immunoglobulin; ICI-P – immune-checkpoint inhibitor

pneumonitis; F – female; M – male; W – white; B – black; NSCLC – non-small cell lung cancer; SCLC – small-cell lung cancer; adeno – adenocarcinoma; SCC – squamous cell carcinoma; N – no; Y – yes; cis – cisplatin; pem – pemetrexed; etop – etoposide; carbo – carboplatin; cyclophos – cyclophosphamide; pembro – pembrolizumab; nivo - nivolumab; durva – durvalumab; ipi – ipilimumab; PR – partial response; SD – stable disease; PD – progressive disease; pred – prednisone; MP – methylprednisolone; PO – by mouth; IV – intravenous; ICH – intracerebral hemorrhage; CP – cancer progression; PE – pulmonary embolism; PNA – pneumonia; N/A – not applicable.

<sup>a</sup> Response to ICI by RECIST 1.1 criteria

<sup>b</sup> CTCAE grade

<sup>c</sup> Includes all hospitalizations for each patient

<sup>d</sup> Herpes Zoster shingles

<sup>e</sup> Parainfluenza pneumonia
