# Supplementary material for: Steroid-refractory PD-(L)1 pneumonitis: incidence, clinical features, treatment, and outcomes
Source: PubMed Central journal article supplement — J Immunother Cancer. 2021 Jan 7;9(1):e001731. doi: 10.1136/jitc-2020-001731 (PMC7797270; doi:10.1136/jitc-2020-001731), 2021-01-07
Supplement: jitc-2020-001731supp002.pdf [file jitc-2020-001731supp002.pdf]

## Supplemental Figure 1: Depiction of Infiltrate Type and Laterality of ICI-Pneumonitis upon Diagnostic Chest CT Scan

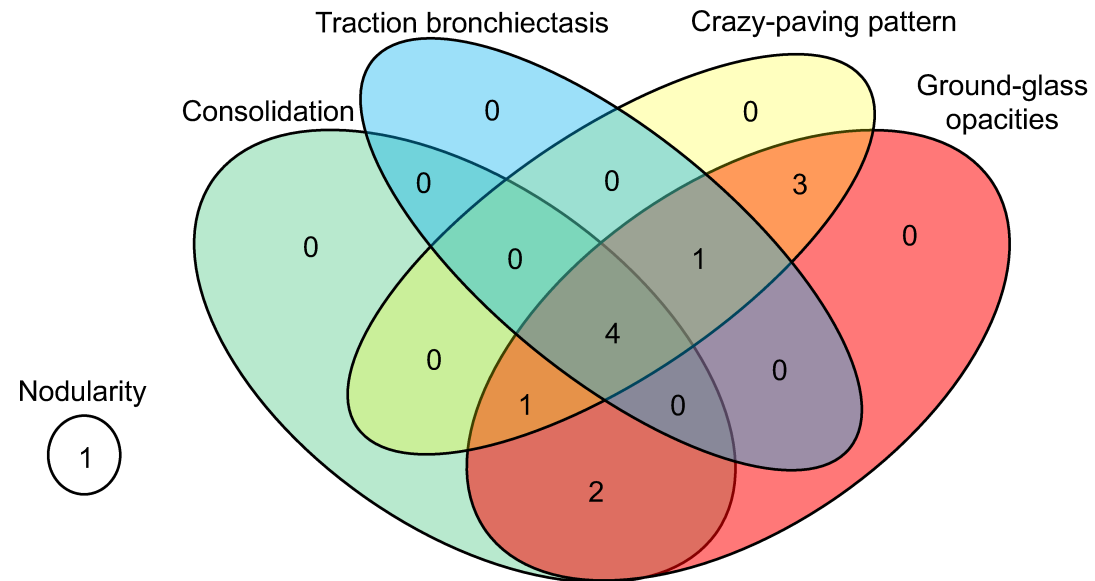

| Treatment group                                            | IVIG | Infliximab | Combination |
|------------------------------------------------------------|------|------------|-------------|
| <b>CIP radiological characteristics</b>                    |      |            |             |
| <b>Consolidation</b>                                       |      |            |             |
| with GGOs                                                  | 1    | 0          | 1           |
| with GGOs + crazy-paving pattern                           | 0    | 1          | 0           |
| with GGOs + traction bronchiectasis + crazy-paving pattern | 4    | 0          | 0           |
| <b>GGOs</b>                                                |      |            |             |
| with crazy-paving pattern                                  | 1    | 1          | 1           |
| with crazy-paving pattern + traction bronchiectasis        | 0    | 0          | 1           |
| Nodularity alone                                           | 1    | 0          | 0           |
| <b>Laterality</b>                                          |      |            |             |
| Unilateral                                                 | 2    | 1          | 0           |
| Bilateral                                                  | 5    | 1          | 3           |
